# Supplementary material
Source: publisher figshare collection journal article supplement (https://acs.figshare.com/ndownloader/files/3718786)
Supplement: Supplementary file 1 [file 3718786]

# Supporting Information

## Efficient Catalytic Epoxidation in Water by Axial N-Ligand-Free Mn-Porphyrins within a Micellar Capsule

Takumi Omagari, Akira Suzuki, Munetaka Akita, Michito Yoshizawa\*

Chemical Resources Laboratory, Tokyo Institute of Technology, 4259 Nagatsuta, Midori-ku, Yokohama 226-8503, Japan; \*E-mail: yoshizawa.m.ac@m.titech.ac.jp

### Contents

- Materials and methods
- Synthesis of  $2\text{D}3_{\text{M}}$  (M = Mn-Cl, Zn, Ni, and Co) and  $2\text{D}4_{\text{Mn-Cl}}$  (UV-visible and  $^1\text{H}$  NMR spectra, DLS analysis)
- General procedure for the catalytic epoxidation of styrenes by  $2\text{D}3_{\text{Mn-Cl}}$  ( $^1\text{H}$  NMR spectra and GC chart)
- Control experiments of the catalytic epoxidation of **5**
- Catalytic epoxidation of various styrenes
- UV-visible spectra of  $3_{\text{Mn-O-Mn}}$  and  $3_{\text{Mn-Cl}}$  before/after the catalytic reaction within **2**
- UV-visible spectra of  $3_{\text{Mn-Cl}}$  and  $3_{\text{Mn=O}}$  within/without **2**
- UV-visible spectra of  $2\text{D}3_{\text{Mn-Cl}}$  and  $3_{\text{Mn-Cl}}$  after the addition of **5** and **6**
- Time course of the epoxidation of **5** by  $2\text{D}3_{\text{Mn-Cl}}$  without imidazole

## Materials and methods

NMR: Bruker AVANCE-400 (400 MHz), MALDI-TOF MS: Shimadzu AXIMA-CFR Plus, ESI-TOF MS: Bruker micrOTOF II, Particle Size Analysis (DLS): Wyatt Technology DynaPro Nanostar, FT-IR: JASCO FT/IR-4200, UV-vis: JASCO V-670DS, Gas Chromatograph: Shimadzu GC-2014AFsc.

Solvents and reagents: TCI Co., Ltd., Wako Pure Chemical Industries Ltd., Kanto Chemical Co., Inc., Sigma-Aldrich Co., and Cambridge Isotope Laboratories, Inc.

Compounds: **1**, **2**, and metallo-porphyrins **3<sub>M</sub>** and **4<sub>Mn-Cl</sub>** were synthesized according to previously published procedures.<sup>[1,2]</sup>

## References

- [1] Kondo, K.; Suzuki, A.; Akita, M.; Yoshizawa, M. *Angew. Chem. Int. Ed.* **2013**, *52*, 2308–2312.
- [2] Alder, A. D.; Longo, F. R.; Kampas, F.; Kim, J. *J. Inorg. Nucl. Chem.* **1970**, *32*, 2443–2445.
- [3] Guo, C. C.; Li, H. P.; Xu, J. B. *J. Catal.* **1999**, *185*, 345–351.

## Synthesis of $2\supset 3_{\text{Mn-Cl}}$ and $2\supset 4_{\text{Mn-Cl}}$

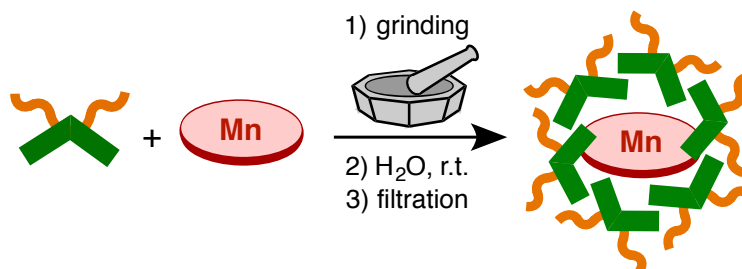

A mixture of amphiphilic compound **1** (1.5 mg, 2.0  $\mu\text{mol}$ ) and tetraphenylporphine manganese(III) chloride (**3**<sub>Mn-Cl</sub>; 0.7 mg, 1.0  $\mu\text{mol}$ ) was ground for 5 min by using an agate mortar and pestle followed by the addition of H<sub>2</sub>O (1.0 mL) at r.t. After an excess **3**<sub>Mn-Cl</sub> was removed by centrifugation and filtration, a clear green solution of **2** containing **3**<sub>Mn-Cl</sub> (63%) was obtained. The formation of  $2\supset 3_{\text{Mn-Cl}}$  composite was confirmed by <sup>1</sup>H NMR, UV-visible, and DLS analyses. By using zinc(II) tetraphenylporphine **3**<sub>Zn</sub>, nickel(II) tetraphenylporphine **3**<sub>Ni</sub>, cobalt(II) tetraphenylporphine **3**<sub>Co</sub>, and fluorinated tetraphenylporphyrin manganese(III) chloride **4**<sub>Mn-Cl</sub>, host-guest composites  $2\supset 3_{\text{Zn}}$ ,  $2\supset 3_{\text{Ni}}$ ,  $2\supset 3_{\text{Co}}$ , and  $2\supset 4_{\text{Mn-Cl}}$  were also prepared by the same procedure. The host-guest ratios were estimated by UV-visible analysis in CH<sub>2</sub>Cl<sub>2</sub> after freeze-drying of the aqueous solutions.

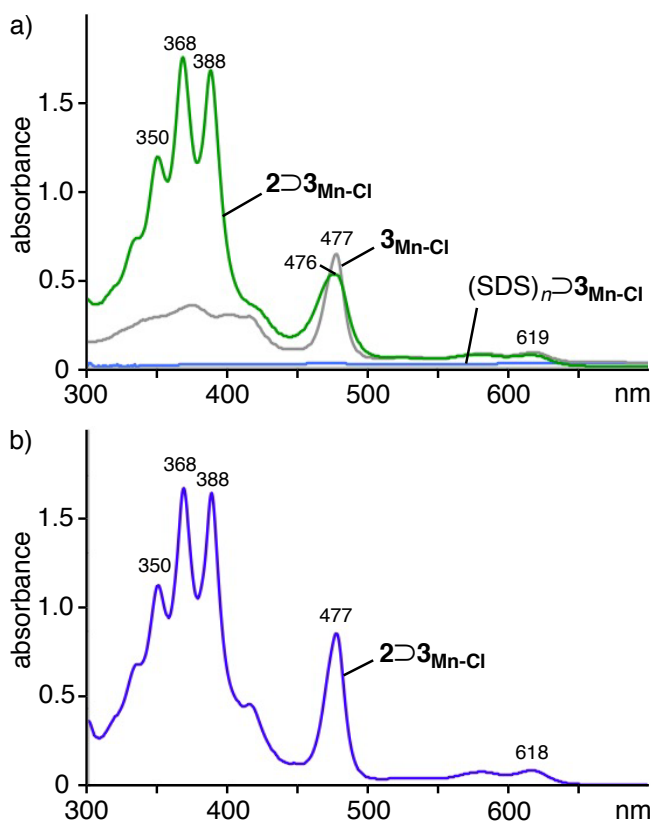

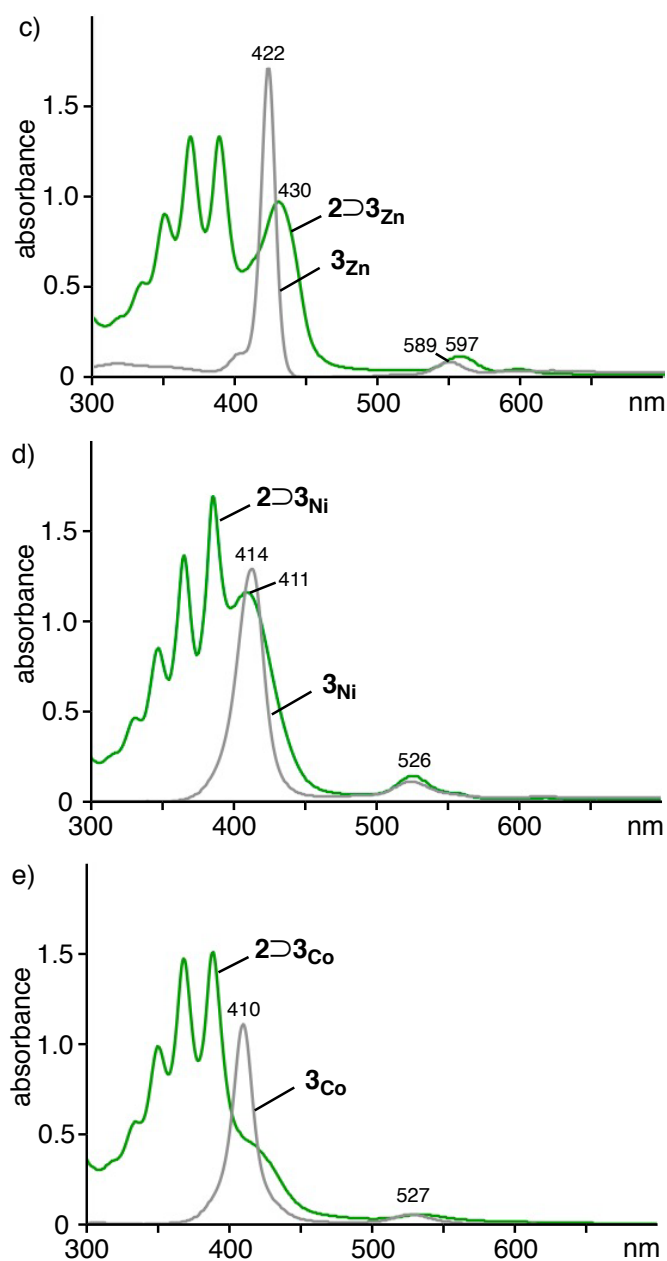

**Figure S1.** UV-visible spectra (r.t.) of  $3_M$  in  $CH_2Cl_2$  (0.05 mM) and  $2D3_M$  in  $H_2O$  (1.0 mM based on **1**). M = a) Mn-Cl, c) Zn, d) Ni, and e) Co. b) UV-visible spectrum (r.t.) of  $2D3_{Mn-Cl}$  in  $CH_2Cl_2$  after freeze-drying of the aqueous  $2D3_{Mn-Cl}$  solution.

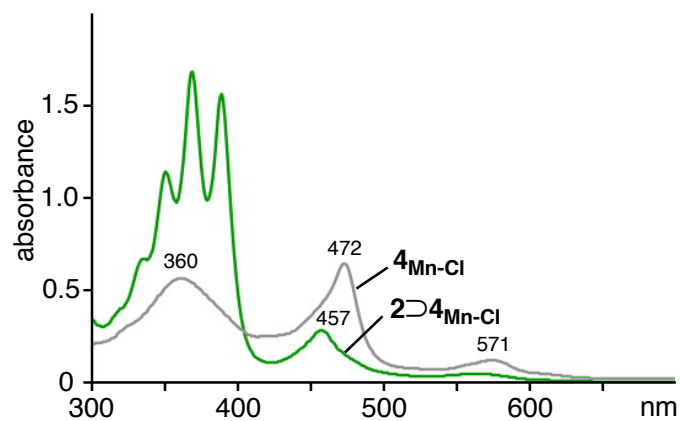

**Figure S2.** UV-visible spectra (r.t.) of  $4_{\text{Mn-Cl}}$  in  $\text{CH}_2\text{Cl}_2$  (0.05 mM) and  $2\supset 4_{\text{Mn-Cl}}$  in  $\text{H}_2\text{O}$  (1.0 mM based on **1**).

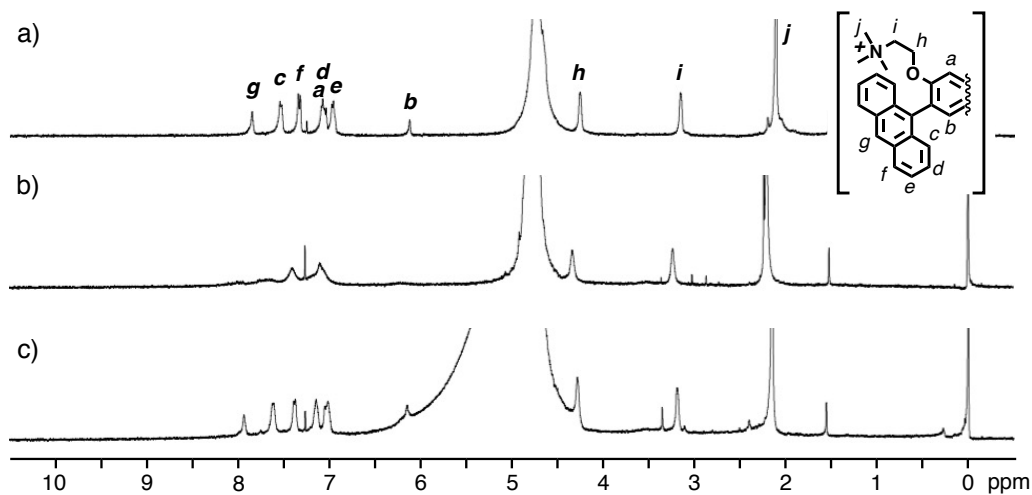

**Figure S3a.**  $^1\text{H}$  NMR spectra (400 MHz,  $\text{D}_2\text{O}$ , r.t.) of a) **2**, b)  $2\supset 3_{\text{Mn-Cl}}$ , and c)  $2\supset 3_{\text{Zn}}$ .

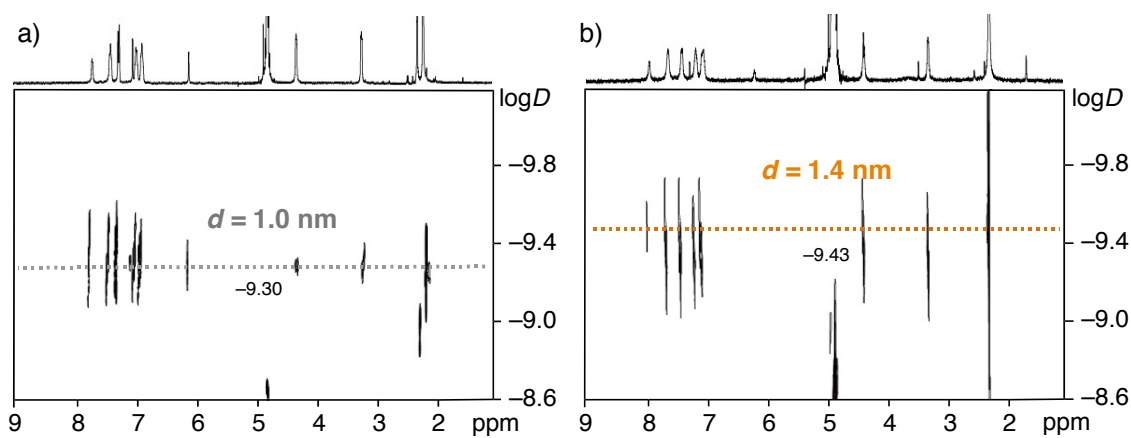

**Figure S3b.** DOSY NMR spectra (400 MHz,  $\text{D}_2\text{O}$ , r.t.) of a) **2** and b)  $2\supset 3_{\text{Zn}}$ .

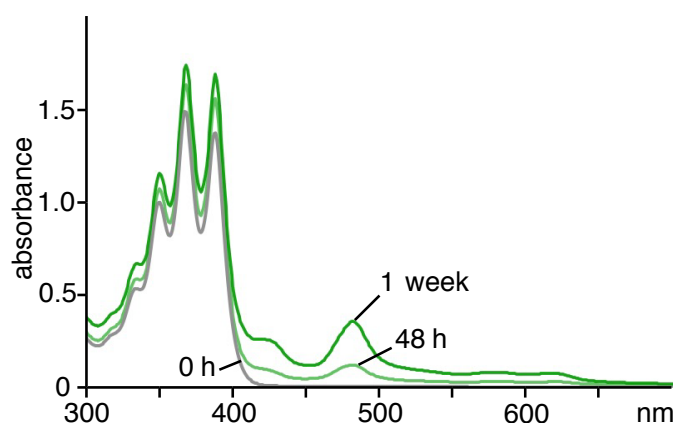

**Figure S4.** UV-visible spectra ( $\text{H}_2\text{O}$ , r.t., 1.0 mM based on **1**) of **2** and **3**<sub>Mn-Cl</sub> by the preparation through stirring a mixture of capsule **2** and **3**<sub>Mn-Cl</sub> in  $\text{H}_2\text{O}$  at r.t. without grinding.

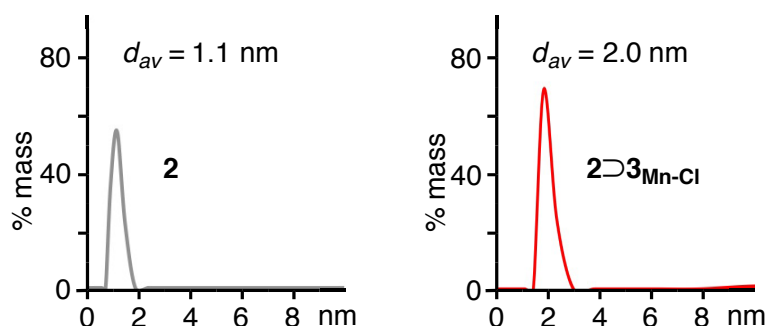

**Figure S5.** Size distribution of **2** and **2** and **3**<sub>Mn-Cl</sub> in  $\text{H}_2\text{O}$  (1.0 mM based on **1**) by DLS measurement at r.t.

### General procedure for the catalytic epoxidation of styrenes by **2** and **3**<sub>Mn-Cl</sub>

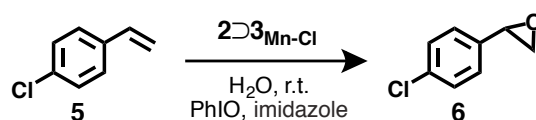

A  $\text{H}_2\text{O}$  solution (1.0 mL) of **2** and **3**<sub>Mn-Cl</sub> (0.2  $\mu\text{mol}$  based on **3**<sub>Mn-Cl</sub>), imidazole (0.7 mg, 10  $\mu\text{mol}$ ), and iodosylbenzene (44.0 mg, 200  $\mu\text{mol}$ ) were added to a microtube containing 4-chlorostyrene (13.9 mg, 100  $\mu\text{mol}$ ). The reaction mixture was vigorously stirred (600 rpm) for 4 h at r.t. under air. NaCl (~10 mg) was added to the resultant solution and then the products were extracted with  $\text{CDCl}_3$  ( $2 \times 0.25 \text{ mL}$ ). The organic layer was separated after centrifuging for 1 min at 13000 rpm. The obtained products

were analyzed by  $^1\text{H}$  NMR after adding tetraethylsilane (7.2 mg, 50  $\mu\text{mol}$ ) as an internal standard to the organic solution. After the addition of naphthalene (12.8 mg, 100  $\mu\text{mol}$ ) as an internal standard, the products were further analyzed by GC.

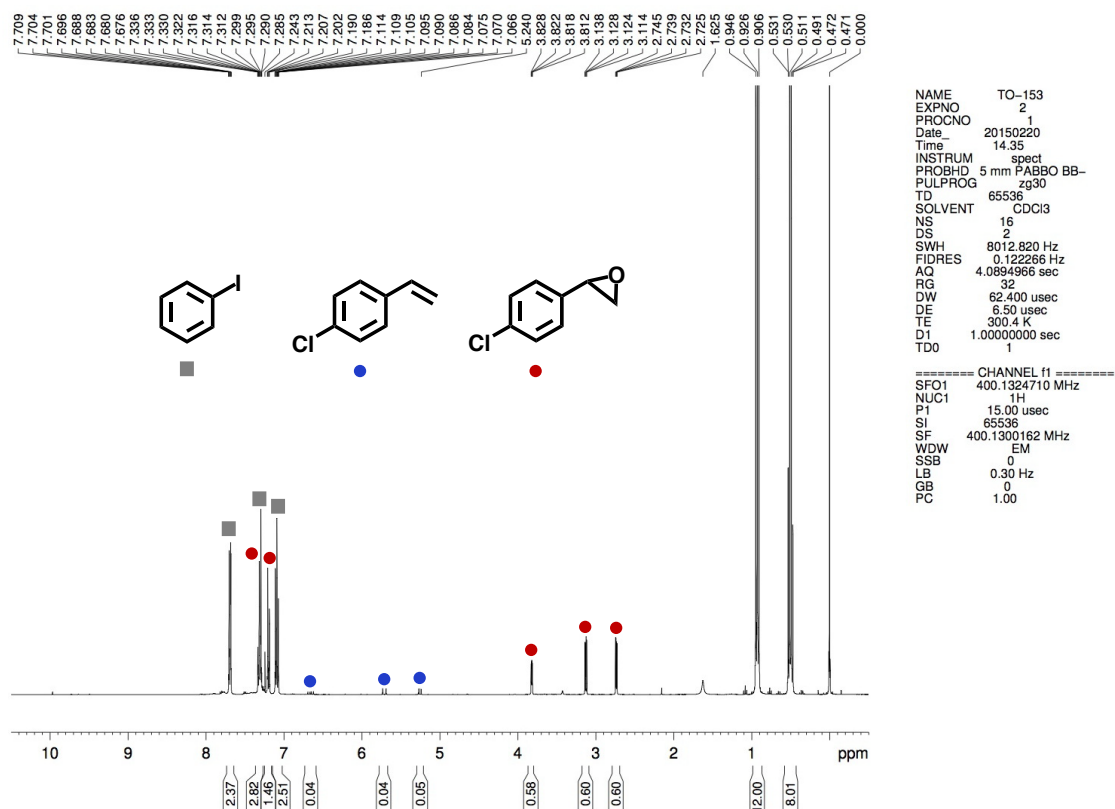

**Figure S6.**  $^1\text{H}$  NMR spectrum (400 MHz,  $\text{CDCl}_3$ , r.t.) of crude products after the catalytic epoxidation of **5** by **2**  $\text{D3}_{\text{Mn-Cl}}$  (Table 1, entry 1).

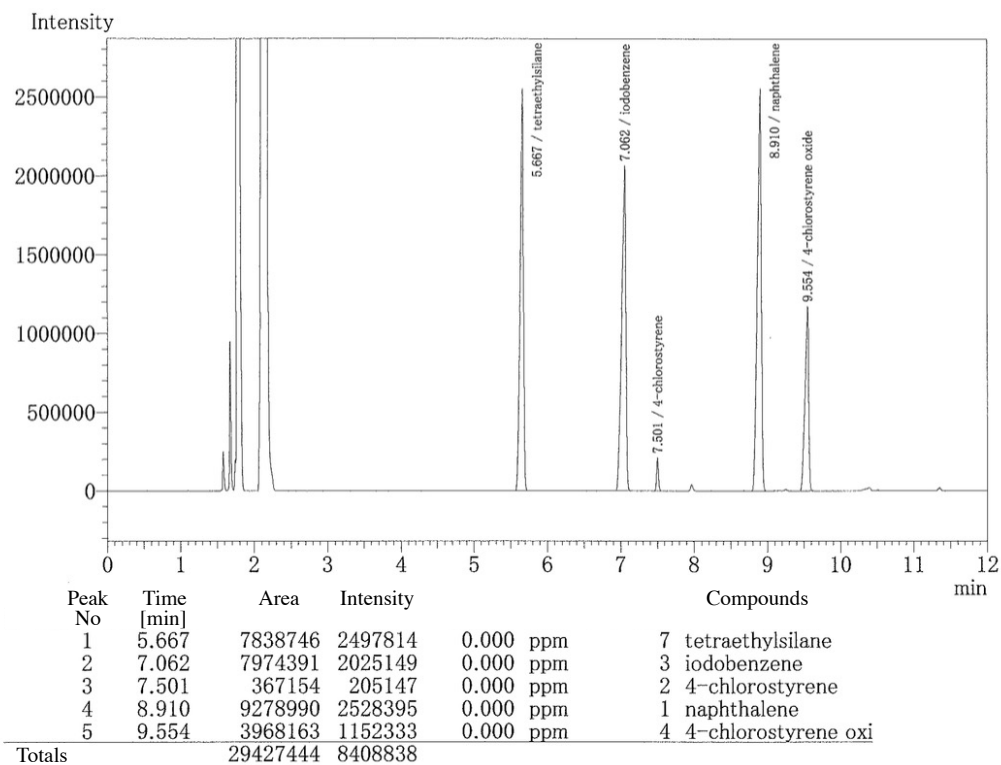

**Figure S7a.** GC chart of crude products after the catalytic epoxidation of **5** by **2D3<sub>Mn-Cl</sub>**.

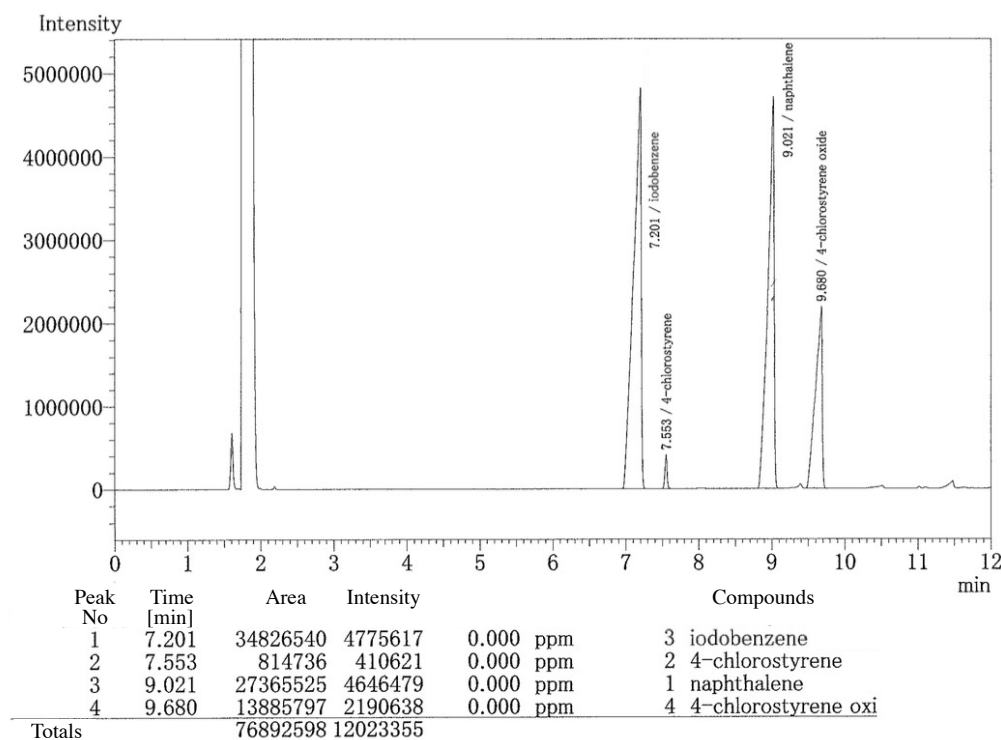

**Figure S7b.** GC chart of crude products after the catalytic epoxidation of **5** by **2D4<sub>Mn-Cl</sub>**.



**Table S1.** Control experiments of the catalytic epoxidation of **5**.

| entry | catalyst<br>[μmol]                         | imidazole<br>[μmol] | PhIO<br>[μmol] | yield<br>[%] | TON |
|-------|--------------------------------------------|---------------------|----------------|--------------|-----|
| 1     | <b>2</b> ⊃ <b>3</b> <sub>Mn-Cl</sub> (0.2) | 10                  | 200            | 69           | 345 |
| 2     | -                                          | 10                  | 200            | 0            | 0   |
| 3     | <b>2</b> ⊃ <b>3</b> <sub>Mn-Cl</sub> (0.2) | 0                   | 200            | 56           | 280 |
| 4     | <b>2</b> ⊃ <b>3</b> <sub>Mn-Cl</sub> (0.2) | 10                  | 0              | 0            | 0   |
| 5     | <b>2</b>                                   | 10                  | 200            | 0            | 0   |

Conditions: catalyst (0.2 or 0 μmol), **5** (100 μmol), imidazole (10 or 0 μmol), PhIO (200 or 0 μmol) in H<sub>2</sub>O at r.t. for 4 h.

**Table S2.** The catalytic epoxidation of various styrenes.

| entry | catalyst<br>[μmol]                                       | substrate | time<br>[h] | imidazole<br>[μmol] | yield<br>[%] | TON  |
|-------|----------------------------------------------------------|-----------|-------------|---------------------|--------------|------|
| 1     | <b>2</b> '⊃ <b>3</b> <sub>Mn-Cl</sub> (0.2)              | <b>5</b>  | 4           | 10                  | 58           | 290  |
| 2     | <b>2</b> <sub>Cl</sub> ⊃ <b>3</b> <sub>Mn-Cl</sub> (0.1) | <b>5</b>  | 4           | 10                  | 55           | 550  |
| 3     | (SDS) <sub>n</sub> ⊃ <b>3</b> <sub>Mn-Cl</sub> (0.01)    | <b>5</b>  | 4           | 10                  | 2            | 200  |
| 4     | <b>2</b> ⊃ <b>3</b> <sub>Mn-Cl</sub> (0.2)               | <b>9</b>  | 4           | 0                   | 29           | 145  |
| 5     | <b>2</b> ⊃ <b>4</b> <sub>Mn-Cl</sub> (0.06)              | <b>7</b>  | 1           | 0                   | 78           | 1300 |
| 6     | <b>2</b> ⊃ <b>4</b> <sub>Mn-Cl</sub> (0.06)              | <b>8</b>  | 1           | 0                   | 81           | 1350 |
| 7     | <b>2</b> ⊃ <b>4</b> <sub>Mn-Cl</sub> (0.06)              | <b>10</b> | 1           | 0                   | 34           | 567  |

**5**

**7**

**8**

**9**

**10**

$\mathbf{2} \begin{cases} \text{R} = \text{H} \\ \text{X} = \text{NO}_3 \end{cases}$   
 $\mathbf{2}' \begin{cases} \text{R} = \text{H} \\ \text{X} = \text{Cl} \end{cases}$   
 $\mathbf{2}_{\text{Cl}} \begin{cases} \text{R} = \text{Cl} \\ \text{X} = \text{Cl} \end{cases}$

Conditions: catalyst (0.01-0.2 μmol), styrenes (100 μmol), imidazole (10 or 0 μmol), PhIO (200 μmol) in H<sub>2</sub>O at r.t. for 1 or 4 h.

S9

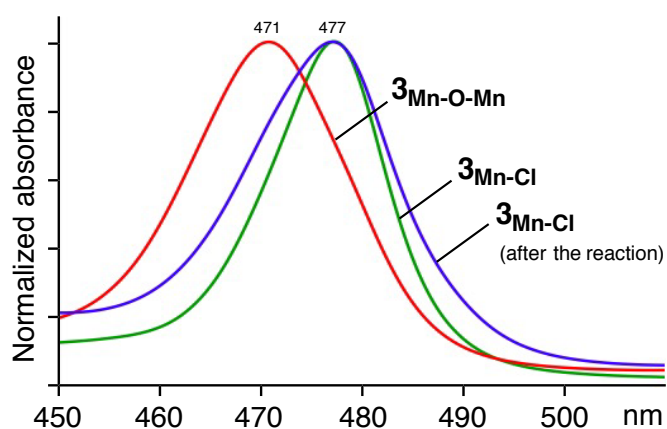

**Figure S8.** UV-visible spectra ( $\text{CH}_2\text{Cl}_2$ , r.t.) of  $3_{\text{Mn-O-Mn}}$ <sup>[3]</sup> and  $3_{\text{Mn-Cl}}$  before/after the catalytic reaction within capsule **2**.

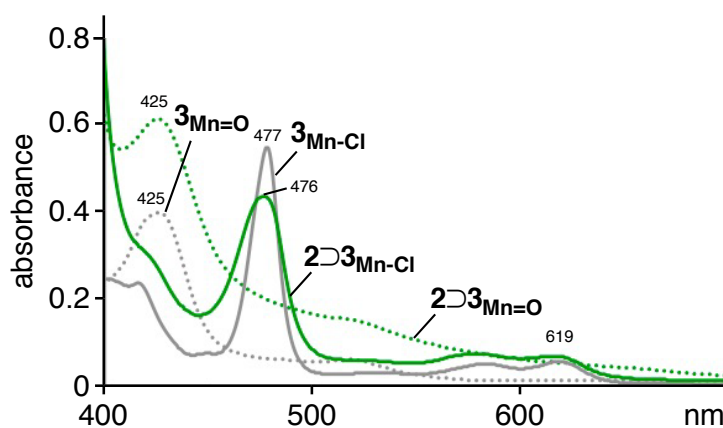

**Figure S9.** UV-visible spectra (r.t.) of  $3_{\text{Mn-Cl}}$  and  $3_{\text{Mn=O}}$  in  $\text{CH}_2\text{Cl}_2$  (0.05 mM) and  $2 3_{\text{Mn-Cl}}$  and  $2 3_{\text{Mn=O}}$  (1.0 mM based on **1**) in  $\text{H}_2\text{O}$ .

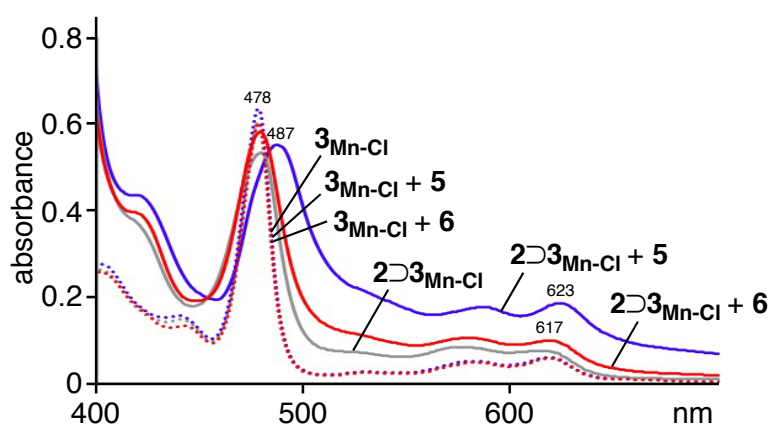

**Figure S10.** UV-visible spectra of  $3_{\text{Mn-Cl}}$  before and after the addition of **5** or **6** (50 equiv. each) in  $\text{CH}_2\text{Cl}_2$  (dot lines) and  $2 3_{\text{Mn-Cl}}$  before and after the addition of **5** or **6** (50 equiv. each) in  $\text{H}_2\text{O}$  (solid lines).

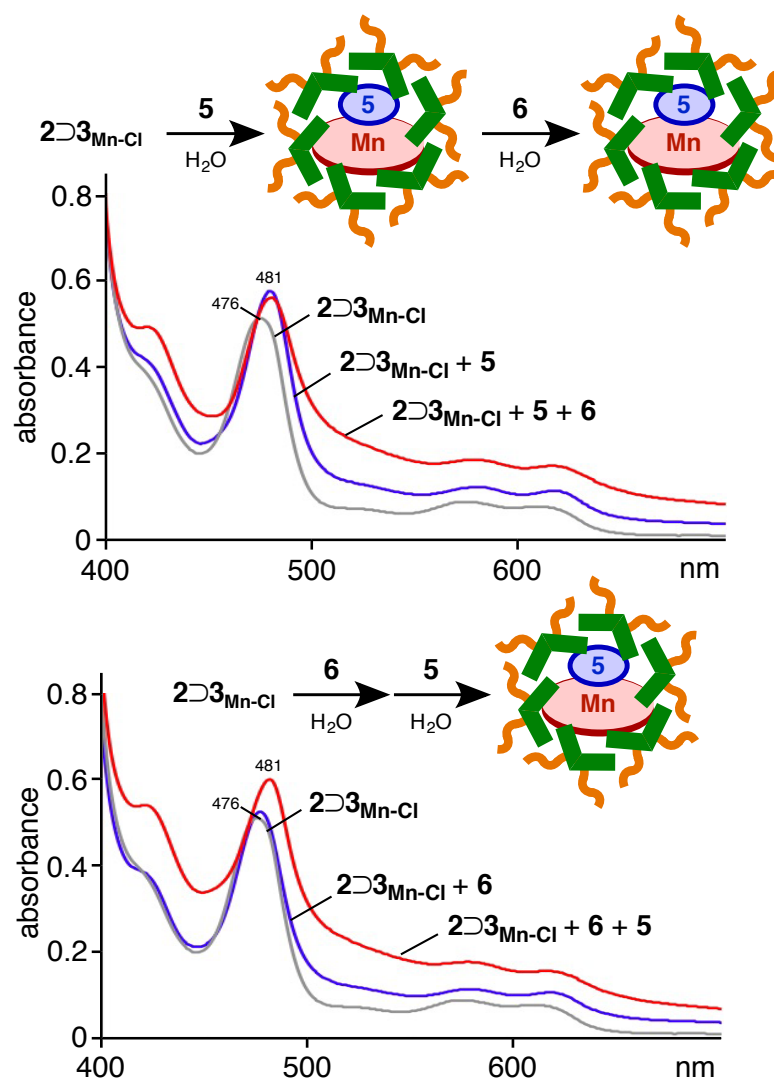

**Figure S11.** UV-visible spectra of  $2D3_{Mn-Cl}$  after the addition of **5** and/or **6** (25 equiv. each) in  $H_2O$ .

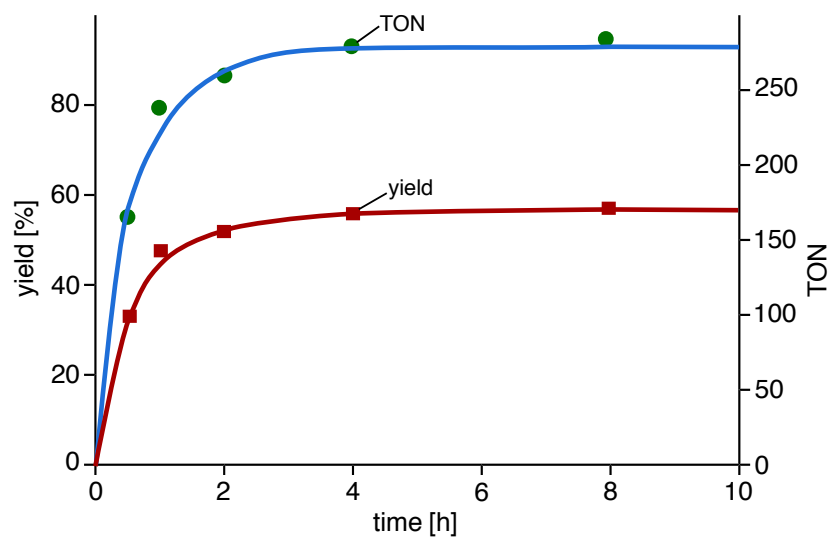

**Figure S12.** Time course of the epoxidation of **5** by  $2D3_{Mn-Cl}$  without imidazole in  $H_2O$ .
